# Supplementary material
Source: Copernicus journal article supplement (doi:10.5194/amt-19-3123-2026)
Supplement: Supplementary file [file amt-19-3123-2026-supplement-title-page.pdf › amt-19-3123-2026-supplement-title-page.pdf]

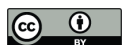

*Supplement of*

## **Quantitative uncertainty and post-processing for micro-aethalometers measuring black carbon**

**Timothy A. Sipkens et al.**

*Correspondence to:* Timothy A. Sipkens ([timothy.sipkens@nrc-cnrc.gc.ca](mailto:timothy.sipkens@nrc-cnrc.gc.ca))

- amt-19-3123-2026-supplement-title-page.pdf
- data
  - data\_full.csv
  - data\_mini.csv
- main\_calc\_lod.py
- main\_test.py
- main\_x.py
- postprocess.py

The copyright of individual parts of the supplement might differ from the article licence.
